## RESEARCH ARTICLE

## Modification of the association between coffee consumption and constipation by alcohol drinking: A cross-sectional analysis of NHANES 2007–2010

Wanru Kong<sup>1</sup>, Wei Sheng<sup>2\*</sup>, Ya Zheng<sup>3,4\*</sup>

**1** Department of Infection Management, Gansu Provincial Hospital, Lanzhou, Gansu, China, **2** School of Public Health, Xiamen University, Xiamen, Fujian, China, **3** Department of Gastroenterology, The First Hospital of Lanzhou University, Lanzhou, Gansu, China, **4** Gansu Province Clinical Research Center for Digestive Diseases, The First Hospital of Lanzhou University, Lanzhou, Gansu, China

\* [zhengy2010@lzu.edu.cn](mailto:zhengy2010@lzu.edu.cn) (YZ); [609686484@qq.com](mailto:609686484@qq.com) (WS)

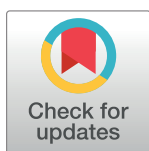

## Abstract

## OPEN ACCESS

**Citation:** Kong W, Sheng W, Zheng Y (2024) Modification of the association between coffee consumption and constipation by alcohol drinking: A cross-sectional analysis of NHANES 2007–2010. PLoS ONE 19(10): e0311916. <https://doi.org/10.1371/journal.pone.0311916>

**Editor:** Pratibha V. Nerurkar, University of Hawai'i at Manoa College of Tropical Agriculture and Human Resources, UNITED STATES OF AMERICA

**Received:** June 11, 2024

**Accepted:** September 26, 2024

**Published:** October 25, 2024

**Copyright:** © 2024 Kong et al. This is an open access article distributed under the terms of the [Creative Commons Attribution License](https://creativecommons.org/licenses/by/4.0/), which permits unrestricted use, distribution, and reproduction in any medium, provided the original author and source are credited.

**Data Availability Statement:** All data are available from the NHANES database: <https://www.cdc.gov/nchs/nhanes/>.

**Funding:** YZ received funding from the Natural Science Foundation of Gansu Province (Grant Number: 23JRRA0939) and the Foundation of The First Hospital of Lanzhou University (Grant Number: ldyyn2021-59). The funders had no role in study design, data collection and analysis,

## Background

The association between coffee consumption and constipation remains unclear. This study aimed to examine the relationship of coffee consumption with the risk of constipation, while also investigating potential effect modifiers.

## Methods

This cross-sectional study included 7844 participants from the National Health and Nutrition Examination Survey (NHANES) 2007–2010. Coffee consumption was extracted from the 24-hour dietary recall. Constipation was assessed using the Bristol Stool Form Scale. The association between coffee consumption and constipation was assessed using multivariable restricted cubic spline and logistic regression with odds ratio (OR) and 95% confidence interval (CI).

## Results

There was a J-shaped relationship between total coffee consumption and the risk of constipation in the whole population ( $p$  for nonlinearity = 0.049), with 1–2 cups/day of total coffee potentially reducing the risk of constipation by 39% (OR 0.61, 95% CI 0.35–1.06,  $p$  = 0.07). As for caffeinated coffee, a J-shaped association between its consumption and the risk of constipation was also observed in the whole population ( $p$  for nonlinearity = 0.008), with 1–2 cups/day being significantly associated with a reduced risk (OR 0.57, 95% CI 0.35–0.95,  $p$  = 0.03). When restricting to never drinkers of alcohol, the associations between total and caffeinated coffee consumption and constipation shifted to inverse linear trends, where at least 3 cups/day was significantly associated with an 88% reduction in constipation risk (total coffee: OR 0.12, 95% CI 0.02–0.68,  $p$  = 0.02; caffeinated coffee: OR 0.12, 95% CI 0.02–0.70,  $p$  = 0.02). Decaffeinated coffee showed no association with constipation.

decision to publish, or preparation of the manuscript.

**Competing interests:** The authors have declared that no competing interests exist.

**Abbreviations:** BMI, Body Mass Index; BSFS, Bristol Stool Form Scale; CI, Confidence Interval; HEI, Healthy Eating Index; NCHS, National Center for Health Statistics; NHANES, National Health and Nutrition Examination Survey; SE, Standard error.

## Conclusions

Consuming 1–2 cups of caffeinated coffee daily was associated with a reduced risk of constipation in the general population. Among never drinkers of alcohol, a linear protective effect was observed, with a notable 88% reduction in constipation risk for those consuming at least 3 cups per day. Moderate caffeinated coffee intake may therefore be a viable dietary strategy for managing constipation in the general population.

## Introduction

Coffee is one of the most popular and consumed beverages worldwide. The associations of coffee consumption with several diseases have been investigated. Coffee consumption has been linked with a reduced risk of several diseases, such as type 2 diabetes mellitus [1], cardiovascular diseases [2], liver outcomes [3–5], gallstone diseases [6], neurologic diseases [7–11], kidney function [12], prostate cancer [13], endometrial cancer [14], melanoma [15], non-melanoma skin cancer [16], colorectal cancer [17], as well as total mortality [18,19], suggesting its role in health promotion.

Chronic constipation is a highly prevalent global health issue that imposes a considerable economic burden and negatively affects the quality of life. The pooled prevalence of constipation is 14%, ranging from approximately 11% to 18% worldwide [20]. United States alone, constipation is responsible for about one million hospital visits each year [21]. Common risk factors for constipation include being female, advanced age, lower socioeconomic status, obesity, physical inactivity, diabetes, and low fluid intake [20,22,23].

The relationship between coffee consumption and constipation is poorly studied and controversial, with some studies suggesting a beneficial effect [24,25], while others reported no significant association [26]. These disparate results may be due to various factors, such as small sample size, unrepresentative population, inaccurate dietary measurements, different constipation definitions, and insufficient adjustment for confounders. In this study, we aim to examine the association of coffee consumption with constipation in a large representative sample of the U.S. population from the National Health and Nutrition Examination Survey (NHANES). Additionally, we also seek to explore the potential interactions of coffee consumption with other factors on constipation.

## Methods

### Study population

The National Health and Nutrition Examination Survey (NHANES) is a series of cross-sectional surveys conducted in the United States by the National Center for Health Statistics (NCHS). It employs a complex, multistage, clustered design to collect nationally representative data on the health and nutrition of the U.S. civilian, noninstitutionalized population. The NCHS Research Ethics Review Board approved the survey (Approval Number: #2005–06) and all of the participants provided written informed consent. All procedures were conducted in accordance with the relevant guidelines and regulations.

For the current study, the NHANES 2007–2008 and 2009–2010 cycles were combined. A total of 11766 participants aged 20 years or older who received an investigation for fecal incontinence and defecating function in a mobile examination center were identified. Among them, 10379 participants completed the Bristol Stool Form Scale (BSFS) questionnaire. After

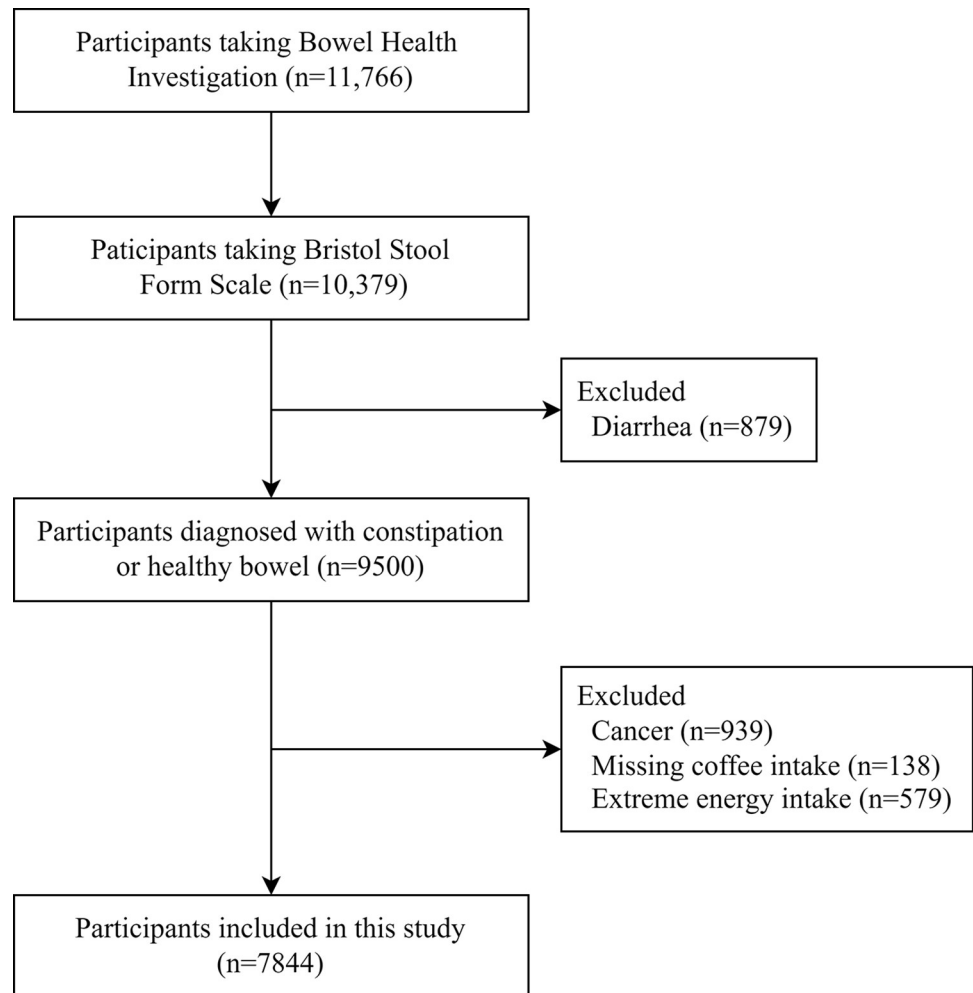

**Fig 1. Flow chart of the study population.** This figure depicts the study population screening process and the inclusion and exclusion criteria.

<https://doi.org/10.1371/journal.pone.0311916.g001>

excluding participants diagnosed with diarrhea ( $n = 879$ ), having a history of cancer ( $n = 939$ ), with missing data on coffee consumption (138) and with extreme energy intake (daily energy intake  $< 600$  or  $> 3500$  kcal for women and  $< 800$  or  $> 4200$  kcal for men;  $n = 578$ ), a total of 7844 participants were included in this study (Fig 1).

### Constipation definition

Constipation was assessed using the Bristol Stool Form Scale (BSFS), which is a valid and reliable measure for assessing stool form and has been used in many epidemiological studies [23,27–29]. The questionnaires were completed using a Computer-Assisted Personal Interview System in a Mobile Examination Center. Participants were asked to do the following: “Please look at this card and tell me the number that corresponds with your usual or most common stool type.” A card with colored pictures and descriptions of the seven BSFS types (Type 1–Type 7) was provided simultaneously for reference. Subjects who identified their usual or most common stool type as Type 1 (separate hard lumps, such as nuts) or Type 2 (sausage-like, but lumpy) were classified as having constipation. Those who reported their usual or most common stool type as Type 3 (like a sausage but with cracks in the surface), Type 4 (like

a sausage or snake, smooth and soft) or Type 5 (soft blobs with clear-cut edges) were classified as having normal stool consistency.

### Assessment of coffee consumption

Coffee consumption was assessed through a single 24-hour dietary recall interview conducted in person at the Mobile Examination Center by trained dietary interviewers from the NHANES program. Coffee, caffeinated coffee, and decaffeinated coffee intake were transformed into standardized cup measurements, where one cup was equivalent to 6 fluid ounces. These intake levels were then categorized as Nondrinkers or <1 cup, 1–2 cups ( $\geq 1$  cup and < 2 cups), 2–3 cups ( $\geq 2$  cups and < 3 cups) and  $\geq 3$  cups.

### Covariates

We obtained self-reported data on age, sex, education, ethnicity, alcohol consumption, smoking, and vigorous physical activity. Alcohol drinking information was collected from questions about participants' alcohol drinking behavior in their lifetime and past 12 months. Participants were classified into three groups: never (had < 12 drinks in lifetime), former (did not drink last year but drank  $\geq 12$  drinks in lifetime, or drank  $\geq 12$  drinks in one year and did not drink last year) and current (at least one drink last year). Smoking status was categorized into never, former, and current smokers. Vigorous physical activity was identified based on responses to two questions from the physical activity questionnaire. Participants were asked: (1) "Does your work involve vigorous-intensity activity that causes large increases in breathing or heart rate, such as carrying or lifting heavy loads, digging, or construction work for at least 10 minutes continuously?" and (2) "Do you do any vigorous-intensity sports, fitness, or recreational activities that cause large increases in breathing or heart rate, such as running or basketball, for at least 10 minutes continuously?" Participants who answered "Yes" to either of these questions were classified as engaging in vigorous physical activity. Body mass index (BMI) was calculated as the weight (in kilograms) divided by the square of height (in meters). Hypertension was determined through self-reported diagnosis, medication use, and/or an average systolic blood pressure of at least 130 mmHg or diastolic blood pressure of at least 80 mmHg. Diabetes was identified by self-report, insulin or medication use, and/or the level of glycohemoglobin HbA1c  $\geq 6.5\%$ . Depression was assessed using the PHQ9 questionnaire, with a score of 10 or more indicating depression [30].

As for dietary covariates, Healthy Eating Index 2015 (HEI-2015) scores were derived from the 24-hour dietary recall interview [31]. The HEI-2015 is a comprehensive measure of diet quality that assesses conformance to the Dietary Guidelines for Americans. It includes 13 components that cover various aspects of diet, such as total fruits, whole fruits, total vegetables, greens and beans, whole grains, dairy, total protein foods, seafood and plant proteins, fatty acids, refined grains, sodium, added sugars, and saturated fats. Higher HEI-2015 scores indicate a diet that aligns closely with dietary recommendations. By including HEI-2015 in our analysis, we account for a broad range of dietary factors, simplifying the model and reducing the risk of multicollinearity that could arise from including numerous individual dietary variables. Energy intake was also derived from the 24-hour dietary recall interview.

### Statistical analysis

Continuous variables were presented as mean (SE) and compared using the Wilcoxon rank-sum test; categorical variables were presented as percentages with SE and compared using the chi-squared test. To assess the association between coffee consumption and constipation, we applied two different approaches to capture both linear and nonlinear relationships.

Firstly, we employed restricted cubic splines (RCS) to assess the dose-response association between coffee consumption and the risk of constipation. In this analysis, coffee consumption was treated as a continuous variable, measured in cups per day.

Secondly, for logistic regression analyses, we categorized coffee consumption into four groups: nondrinkers or <1 cup, 1–2 cups, 2–3 cups, and  $\geq 3$  cups per day. This categorization was based on prior results from the RCS analyses. We generated three weighted logistic regression models to evaluate the odds ratio (OR) and 95% confidence intervals (95% CI) for the association between categorized coffee intake and constipation risk: (1) the initial model estimated the crude OR (Model 1); (2) Model 2 adjusted for year cycles, age, sex, ethnicity, education, and BMI; and (3) Model 3 further adjusted for alcohol drinking, smoking, vigorous physical activity, hypertension, diabetes, depression, HEI-2015 score, and energy intake. Sub-group analyses were also performed based on different levels of alcohol drinking due to the significant interaction observed with coffee intake.

All statistical analyses were performed using R version 4.3.0 and accounted for the complex survey design. P values < .05 were considered statistically significant.

## Results

### Participant characteristics

Table 1 shows the distribution of the participants' baseline characteristics by total coffee consumption. The proportions of participants consuming no or less than 1, 1 to 2, 2 to 3, and  $\geq 3$  cups per day of total coffee were 54.5%, 16.1%, 10.3% and 19.1% respectively. For caffeinated coffee consumption specifically, the proportions were 57.5%, 15.1%, 9.6% and 17.9%, showing a higher proportion of participants consuming no or less than 1 cup per day. When it came to decaffeinated coffee, the majority of participants were non-drinkers or consumed less than 1 cup per day (96.6% for non-drinkers or <1 cup, 1.4% for 1–2 cups, 0.9% for 2–3 cups, 1.0% for  $\geq 3$  cups).

Constipation prevalence varies across different levels of coffee consumption ( $p = .014$ ), being highest among nondrinkers or those consuming less than 1 cup per day (9.6%), and lowest among those consuming 1–2 cups per day (6.1%). The average age of participants increased with higher levels of total coffee consumption ( $p < .001$ ). Compared with women, men were more likely to be high coffee drinkers. A higher percentage of the Non-Hispanic White was observed as total coffee intake increased ( $p < .001$ ). The BMI showed a slight variation across total coffee consumption groups ( $p = .03$ ). As coffee intake increased, the percentage of individuals who never drank alcohol decreased, while the percentage of current drinkers increased ( $p < .001$ ). There was a higher percentage of current smokers among those with higher total coffee consumption ( $p < .001$ ). Among coffee consumers, the percentages of individuals engaging in vigorous physical activity and energy intake increased as the total coffee intake increased, while the HEI-2015 score decreased ( $p < 0.05$ ). Hypertension and diabetes also showed a slight variation across total coffee consumption groups ( $p < 0.05$ ).

### Dose-response relationship of coffee consumption with constipation

Fig 2 showed the dose-response relationships between the consumption of total coffee, caffeinated coffee and decaffeinated coffee with constipation adjusting for all covariates. The J-shaped association was observed for both total coffee and caffeinated coffee consumption with constipation ( $p$  for nonlinearity = 0.049 for total coffee and 0.0084 for caffeinated coffee), indicating an initial reduction in the risk of constipation at low to moderate levels of consumption, followed by a plateau or increase in risk at higher levels of consumption. The threshold for the lowest odds of constipation was approximately 1.5 cups/day for total coffee and 1.4 cups/day

Table 1. Survey-weighted characteristics of the study population.

| Characteristic                 | Nondrinkers or <1 cup<br>(n = 4334) | 1–2 cups<br>(n = 1374) | 2–3 cups<br>(n = 846) | ≥3 cups<br>(n = 1290) | p-value |
|--------------------------------|-------------------------------------|------------------------|-----------------------|-----------------------|---------|
| Age, mean (SE)                 | 41.6 (0.42)                         | 48.4 (0.59)            | 50.4 (0.81)           | 50.1 (0.58)           | <0.001  |
| Sex, % (SE)                    |                                     |                        |                       |                       | <0.001  |
| Female                         | 53.3 (0.01)                         | 58.4 (0.02)            | 49.4 (0.02)           | 44.8 (0.02)           |         |
| Male                           | 46.7 (0.01)                         | 41.6 (0.02)            | 50.6 (0.02)           | 55.2 (0.02)           |         |
| Race/ethnicity, % (SE)         |                                     |                        |                       |                       | <0.001  |
| Non-Hispanic White             | 63.0 (0.03)                         | 64.7 (0.03)            | 75.7 (0.02)           | 87.0 (0.02)           |         |
| Non-Hispanic Black             | 15.4 (0.02)                         | 8.8 (0.01)             | 7.5 (0.01)            | 3.0 (0.01)            |         |
| Mexican American               | 9.8 (0.01)                          | 11.2 (0.02)            | 7.9 (0.01)            | 3.9 (0.01)            |         |
| Other Hispanic                 | 5.5 (0.01)                          | 7.3 (0.01)             | 4.7 (0.01)            | 3.1 (0.01)            |         |
| Other Race                     | 6.2 (0.01)                          | 8.0 (0.01)             | 4.3 (0.01)            | 3.0 (0.01)            |         |
| Education, % (SE)              |                                     |                        |                       |                       | 0.22    |
| Less than high school          | 17.8 (0.01)                         | 20.4 (0.02)            | 18.0 (0.02)           | 15.7 (0.02)           |         |
| High school                    | 25.1 (0.01)                         | 22.4 (0.02)            | 23.2 (0.03)           | 24.5 (0.02)           |         |
| Some college                   | 32.2 (0.01)                         | 29.4 (0.02)            | 29.1 (0.02)           | 30.7 (0.02)           |         |
| College or above               | 24.9 (0.01)                         | 27.8 (0.02)            | 29.7 (0.03)           | 29.0 (0.02)           |         |
| BMI, Mean (SE)                 | 28.8 (0.18)                         | 28.1 (0.23)            | 29.1 (0.33)           | 28.3 (0.17)           | 0.03    |
| Alcohol drinking, % (SE)       |                                     |                        |                       |                       | <0.001  |
| Never                          | 13.1 (0.01)                         | 10.1 (0.01)            | 10.6 (0.02)           | 4.6 (0.01)            |         |
| Former                         | 13.9 (0.01)                         | 15.9 (0.02)            | 15.7 (0.02)           | 16.8 (0.02)           |         |
| Current                        | 73.0 (0.01)                         | 74.0 (0.02)            | 73.7 (0.02)           | 78.6 (0.02)           |         |
| Smoking, % (SE)                |                                     |                        |                       |                       | <0.001  |
| Never                          | 63.6 (0.01)                         | 55.3 (0.02)            | 50.6 (0.02)           | 34.8 (0.02)           |         |
| Former                         | 17.2 (0.01)                         | 27.3 (0.02)            | 30.1 (0.02)           | 32.3 (0.02)           |         |
| Current                        | 19.2 (0.01)                         | 17.4 (0.01)            | 19.4 (0.02)           | 32.9 (0.02)           |         |
| Vigorous activity, % (SE)      | 41.0 (0.01)                         | 35.1 (0.02)            | 37.3 (0.02)           | 41.4 (0.02)           | 0.04    |
| Hypertension, % (SE)           | 43.7 (0.01)                         | 46.4 (0.02)            | 52.4 (0.03)           | 49.7 (0.02)           | 0.009   |
| Diabetes, % (SE)               | 8.9 (0.00)                          | 12.3 (0.01)            | 11.6 (0.01)           | 9.5 (0.01)            | 0.02    |
| Depression, % (SE)             | 7.7 (0.01)                          | 5.8 (0.01)             | 7.1 (0.01)            | 8.7 (0.01)            | 0.14    |
| HEI Index, mean (SE)           | 50.3 (0.45)                         | 53.0 (0.49)            | 52.6 (0.50)           | 51.2 (0.79)           | <0.001  |
| Total energy (kcal), mean (SE) | 2,064.4 (18.25)                     | 1,933.4 (32.94)        | 2,043.9 (34.30)       | 2,107.9 (26.02)       | 0.001   |
| Constipation                   | 9.6 (0.00)                          | 6.1 (0.01)             | 6.2 (0.01)            | 6.7 (0.01)            | 0.014   |

BMI: Body mass index; HEI Index: Healthy eating index.

<https://doi.org/10.1371/journal.pone.0311916.t001>

for caffeinated coffee. No significant relationship was observed between decaffeinated coffee consumption and constipation.

### Association of coffee consumption with constipation

To qualify the magnitude of relationships between coffee intake with constipation, we categorized coffee consumption (Nondrinkers or <1, 1–2, 2–3, and ≥3 cups/day) according to prior results of restricted cubic spline analyses. After controlling for potential confounders in Model 2, 1–2 cups/day of total coffee or caffeinated coffee was significantly associated with reduced risk of constipation (total coffee: OR 0.58, 95% CI 0.36–0.92,  $p = 0.02$ ; caffeinated coffee: OR 0.55, 95% CI 0.36–0.84,  $p = 0.008$ ) (Table 2). Upon further consideration of confounders in Mode 3, 1–2 cups/day of total coffee or caffeinated coffee was still associated with a lower risk of constipation although it is marginally significant for total coffee (total coffee: OR 0.61, 95%

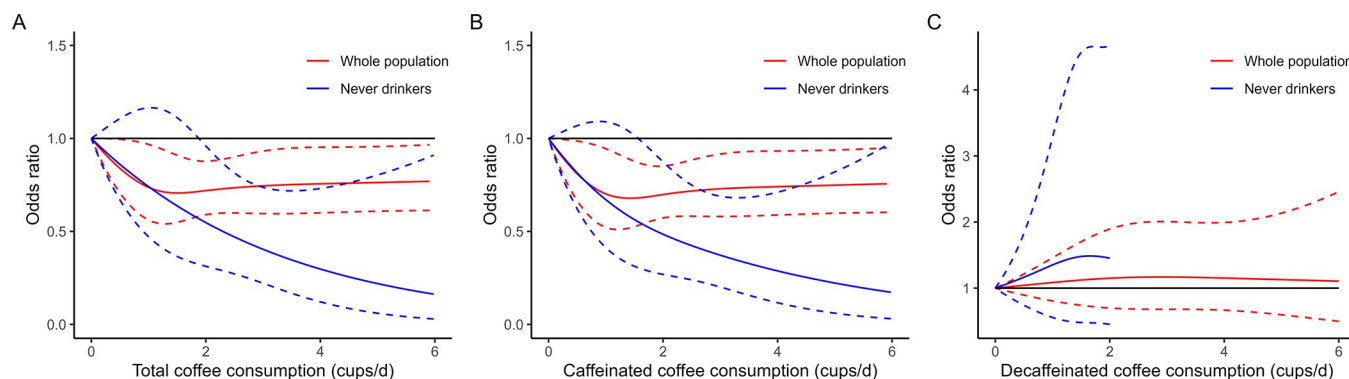

**Fig 2. Restricted cubic splines for the association of coffee consumption with constipation in the whole population and among never drinkers of alcohol.** A: Total coffee consumption and risk of constipation; B: Caffeinated coffee consumption and risk of constipation; C: Decaffeinated coffee consumption and risk of constipation. Models were adjusted for year cycles, age, sex, ethnicity, education, BMI, alcohol drinking (only for whole population analysis), smoking, vigorous activity, hypertension, diabetes, depression, HEI-2015 score and energy intake.

<https://doi.org/10.1371/journal.pone.0311916.g002>

CI 0.35–1.06,  $p = 0.07$ ); caffeinated coffee: OR 0.57, 95% CI 0.35–0.95,  $p = 0.03$ ). No association was observed between decaffeinated coffee and constipation.

### Subgroup analyses

We also detected the interactions between total coffee consumption and covariates and found the association of total coffee intake with constipation differed by alcohol drinking ( $p$  for multiplicative = 0.002,  $p$  for additive < 0.001). For participants who never drank alcohol, at least 3 cups/day of total coffee or caffeinated coffee showed a strong protective effect and was associated with an 88% risk reduction of constipation (Table 3). In addition, the associations of total

**Table 2. Association of coffee consumption with constipation.**

| Characteristics       | Model 1          |         | Model 2          |         | Model 3          |         |
|-----------------------|------------------|---------|------------------|---------|------------------|---------|
|                       | OR (95% CI)      | p-value | OR (95% CI)      | p-value | OR (95% CI)      | p-value |
| Total coffee          |                  |         |                  |         |                  |         |
| Nondrinkers or <1 cup | —                |         | —                |         | —                |         |
| 1–2 cups              | 0.61 (0.40–0.93) | 0.02    | 0.58 (0.36–0.92) | 0.02    | 0.61 (0.35–1.06) | 0.07    |
| 2–3 cups              | 0.62 (0.37–1.06) | 0.08    | 0.70 (0.39–1.26) | 0.21    | 0.73 (0.38–1.39) | 0.29    |
| ≥3 cups               | 0.67 (0.51–0.89) | 0.008   | 0.81 (0.60–1.10) | 0.17    | 0.82 (0.57–1.18) | 0.25    |
| Caffeinated coffee    |                  |         |                  |         |                  |         |
| Nondrinkers or <1 cup | —                |         | —                |         | —                |         |
| 1–2 cups              | 0.57 (0.38–0.85) | 0.007   | 0.55 (0.36–0.84) | 0.008   | 0.57 (0.35–0.95) | 0.03    |
| 2–3 cups              | 0.55 (0.34–0.90) | 0.02    | 0.63 (0.36–1.09) | 0.09    | 0.65 (0.36–1.19) | 0.14    |
| ≥3 cups               | 0.69 (0.53–0.89) | 0.007   | 0.84 (0.64–1.10) | 0.18    | 0.85 (0.61–1.18) | 0.28    |
| Decaffeinated coffee  |                  |         |                  |         |                  |         |
| Nondrinkers or <1 cup | —                |         | —                |         | —                |         |
| 1–2 cups              | 1.34 (0.61–2.93) | 0.46    | 1.15 (0.50–2.66) | 0.72    | 1.22 (0.48–3.12) | 0.64    |
| 2–3 cups              | 1.42 (0.50–4.04) | 0.5     | 1.45 (0.48–4.37) | 0.49    | 1.50 (0.42–5.37) | 0.48    |
| ≥3 cups               | 0.62 (0.22–1.76) | 0.35    | 0.75 (0.26–2.21) | 0.59    | 0.70 (0.22–2.24) | 0.51    |

Model 1: Unadjusted; Model 2: Adjusted for survey cycles, age, sex, ethnicity, education and BMI; Model 3: Additionally adjusted for alcohol drinking, smoking, vigorous physical activity, hypertension, diabetes, depression, HEI Index and total energy intake based on Model 2.

OR: Odds Ratio, CI: Confidence Interval.

<https://doi.org/10.1371/journal.pone.0311916.t002>

Table 3. Association of coffee consumption with constipation by alcohol drinking.

| Characteristic        | Never            |         | Current          |         | Former           |         |
|-----------------------|------------------|---------|------------------|---------|------------------|---------|
|                       | OR (95% CI)      | p-value | OR (95% CI)      | p-value | OR (95% CI)      | p-value |
| Total coffee          |                  |         |                  |         |                  |         |
| Nondrinkers or <1 cup | —                |         | —                |         | —                |         |
| 1–2 cups              | 0.59 (0.31–1.14) | 0.10    | 0.57 (0.28–1.18) | 0.11    | 0.90 (0.50–1.63) | 0.70    |
| 2–3 cups              | 0.79 (0.29–2.15) | 0.62    | 0.66 (0.32–1.33) | 0.21    | 1.12 (0.45–2.76) | 0.79    |
| ≥3 cups               | 0.12 (0.02–0.68) | 0.02    | 0.75 (0.43–1.30) | 0.27    | 1.67 (0.85–3.29) | 0.12    |
| Caffeinated coffee    |                  |         |                  |         |                  |         |
| Nondrinkers or <1 cup | —                |         | —                |         | —                |         |
| 1–2 cups              | 0.54 (0.26–1.12) | 0.09    | 0.53 (0.27–1.05) | 0.07    | 0.90 (0.49–1.67) | 0.71    |
| 2–3 cups              | 0.68 (0.23–2.07) | 0.46    | 0.62 (0.32–1.22) | 0.15    | 0.85 (0.32–2.23) | 0.71    |
| ≥3 cups               | 0.12 (0.02–0.70) | 0.02    | 0.80 (0.45–1.42) | 0.41    | 1.51 (0.75–3.05) | 0.22    |
| Decaffeinated coffee  |                  |         |                  |         |                  |         |
| Nondrinkers or <1 cup | —                |         | —                |         | —                |         |
| 1–2 cups              | 1.00 (0.21–4.63) | >0.99   | 1.68 (0.49–5.76) | 0.37    | 0.83 (0.17–3.92) | 0.79    |
| 2–3 cups              | 2.55 (0.57–11.4) | 0.19    | 1.14 (0.24–5.42) | 0.85    | 2.22 (0.50–9.80) | 0.26    |
| ≥3 cups               | —                | —       | 0.29 (0.06–1.45) | 0.12    | 1.94 (0.48–7.77) | 0.31    |

The associations were adjusted for survey cycles, age, sex, ethnicity, education and BMI, smoking, vigorous physical activity, hypertension, diabetes, depression, HEI Index and total energy intake.

OR: Odds Ratio, CI: Confidence Interval.

<https://doi.org/10.1371/journal.pone.0311916.t003>

coffee and caffeinated coffee with constipation shifted to inverse linear when restricted to never drinkers of alcohol (p for nonlinearity = 0.24 for total coffee, 0.13 for caffeinated coffee) (Fig 2). For participants who were current or former alcohol drinkers, no obvious association was observed.

## Discussion

In this large, population-based cross-sectional study utilizing the NHANES data, we observed a J-shaped association between coffee consumption and risk of constipation in the whole population, with 1–2 cups/day of coffee being associated with lower constipation risk and high coffee consumption not being associated with constipation risk. Notably, the association became linear and inverse after restricting it to never drinkers of alcohol, indicating that the nonlinear relationship observed in the overall population was attributed to the interaction between coffee consumption and drinking. Furthermore, the protective effect of coffee was mainly driven by caffeine, as the association of caffeinated coffee with constipation was stronger either in the whole population or in the never drinkers of alcohol, while decaffeinated coffee showed no discernable relationship with constipation.

Murakami et al. [24] studied the association of coffee intake with self-reported constipation, finding a linear relationship among Japanese women aged 18–20 years. In contrast, Dukas et al. [25] reported a nonlinear relationship between coffee consumption and constipation defined by stool frequency in women, with six or more cups/day of coffee having a slightly increased risk for constipation, while one cup/day or less was inversely associated with constipation. Our results complement these studies and found an inverse but J-shaped relationship of coffee consumption with constipation defined by BSFS in the overall population aged 20 years old and this relationship became linear when restricting it to the never drinkers of alcohol.

Our findings underscore the importance of caffeinated coffee. While both caffeinated and decaffeinated coffee contain a range of bioactive compounds, only caffeinated coffee was associated with a lower risk of constipation. This result is in line with the known biological properties of caffeine, which can stimulate muscle contractions in the gastrointestinal tract, thereby enhancing bowel movements [32,33]. Caffeine promotes bowel movements by increasing the production of hormones like gastrin and cholecystokinin, which trigger the gastrocolic reflex, enhancing peristalsis and colon contraction [34]. It also releases catecholamines such as adrenaline and noradrenaline, further promoting bowel activity [35]. The lack of association between decaffeinated coffee consumption and constipation may thus reflect the absence of this key stimulant. It is worth noting that different brewing methods, types of coffee beans, roast level and preparation methods can affect the caffeine concentration. Therefore, the association between caffeinated coffee and constipation may vary and further studies should be considered.

Our study also unveiled that the relationship between coffee consumption and constipation varied with respect to alcohol drinking status. In participants who never drink alcohol, a linear and inverse relationship between coffee consumption and constipation was observed, while an association was absent among current or former drinkers. This may be explained by the fact that alcohol consumption can interfere with the absorption and metabolism of caffeine, thereby mitigating its effects [36]. Alcohol can also impair gastric emptying and intestinal motility, which may counteract the effect of coffee on constipation.

This study has several strengths. Firstly, our research drew upon nationally large representative data from NHANES, ensuring the results reflect a comprehensive view of the U.S. population. Secondly, we rigorously controlled a wide range of potential confounders, ensuring a more precise estimate of the relationship between coffee consumption and constipation. Thirdly, separate analyses were conducted for caffeinated and decaffeinated coffee, proving that the protective effect of coffee on constipation is attributed to caffeine. Lastly, a modification effect of drinking was observed in our study, indicating that the nonlinear relationship observed in the overall population was attributed to the interaction between coffee consumption and drinking.

Several limitations also need to be considered. Firstly, there is the possibility of reverse causation in our study. Individuals who consume more caffeinated coffee might also engage in other less healthy lifestyle habits, such as higher alcohol consumption and smoking, which could independently affect constipation risk. Conversely, individuals who opt for decaffeinated coffee might do so due to existing health conditions and might generally adhere to healthier lifestyle habits, potentially influencing their constipation risk. Although we controlled for various confounding factors in our analysis, including alcohol consumption, smoking, and physical activity, residual confounding cannot be entirely ruled out. Future longitudinal studies are warranted to further investigate the causal relationship between coffee consumption and constipation, considering the potential reverse causation and the role of underlying health conditions and lifestyle factors. Secondly, the assessment of coffee intake was based on a 24-hour dietary recall interview and thus recall bias is inevitable. Thirdly, the relatively small number of participants who consumed decaffeinated coffee compared to those who consumed caffeinated coffee might have influenced the observed lack of association between decaffeinated coffee and constipation. Fourthly, several additional confounders, such as average daily fluid intake, soft drinks, hot cocoa, energy drinks, and chocolate bars were not accounted for in this analysis. Future research should consider incorporating those factors to provide a more comprehensive understanding of dietary influences on constipation risk. Lastly, our results regarding the cutoff points of coffee consumption should be validated in other populations due to the potential for different distributions of coffee intake.

## Conclusion

In conclusion, consuming 1–2 cups of caffeinated coffee daily was associated with a reduced risk of constipation in the general population. Among never drinkers of alcohol, a linear protective effect was observed, with a notable 88% reduction in constipation risk for those consuming at least 3 cups per day. Moderate caffeinated coffee intake may therefore be a viable dietary strategy for managing constipation in the general population.

## Acknowledgments

We thank the many people who have contributed to the NHANES data we have examined, including all of the participants in the study.

## Author Contributions

**Conceptualization:** Wanru Kong, Wei Sheng, Ya Zheng.

**Data curation:** Wanru Kong.

**Formal analysis:** Wanru Kong.

**Funding acquisition:** Ya Zheng.

**Methodology:** Wanru Kong.

**Software:** Wanru Kong.

**Supervision:** Wei Sheng, Ya Zheng.

**Validation:** Wei Sheng, Ya Zheng.

**Writing – original draft:** Wanru Kong.

**Writing – review & editing:** Wanru Kong, Wei Sheng, Ya Zheng.

## References

1. Carlström M, Larsson SC. Coffee consumption and reduced risk of developing type 2 diabetes: a systematic review with meta-analysis. *Nutr Rev*. 2018 Jun 1; 76(6):395–417. <https://doi.org/10.1093/nutrit/nuy014> PMID: 29590460
2. Grosso G, Micek A, Godos J, Sciacca S, Pajak A, Martínez-González MA, et al. Coffee consumption and risk of all-cause, cardiovascular, and cancer mortality in smokers and non-smokers: a dose-response meta-analysis. *Eur J Epidemiol*. 2016 Dec; 31(12):1191–205. <https://doi.org/10.1007/s10654-016-0202-2> PMID: 27699514
3. Wijarnpreecha K, Thongprayoon C, Ungprasert P. Coffee consumption and risk of nonalcoholic fatty liver disease: a systematic review and meta-analysis. *Eur J Gastroenterol Hepatol*. 2017 Feb; 29(2): e8–12. <https://doi.org/10.1097/MEG.0000000000000776> PMID: 27824642
4. Liu F, Wang X, Wu G, Chen L, Hu P, Ren H, et al. Coffee Consumption Decreases Risks for Hepatic Fibrosis and Cirrhosis: A Meta-Analysis. *PLoS One*. 2015; 10(11):e0142457. <https://doi.org/10.1371/journal.pone.0142457> PMID: 26556483
5. Niezen S, Mehta M, Jiang ZG, Tapper EB. Coffee Consumption Is Associated With Lower Liver Stiffness: A Nationally Representative Study. *Clin Gastroenterol Hepatol*. 2022 Sep; 20(9):2032–2040.e6. <https://doi.org/10.1016/j.cgh.2021.09.042> PMID: 34626832
6. Zhang YP, Li WQ, Sun YL, Zhu RT, Wang WJ. Systematic review with meta-analysis: coffee consumption and the risk of gallstone disease. *Aliment Pharmacol Ther*. 2015 Sep; 42(6):637–48. <https://doi.org/10.1111/apt.13328> PMID: 26198295
7. Liu QP, Wu YF, Cheng HY, Xia T, Ding H, Wang H, et al. Habitual coffee consumption and risk of cognitive decline/dementia: A systematic review and meta-analysis of prospective cohort studies. *Nutrition*. 2016 Jun; 32(6):628–36. <https://doi.org/10.1016/j.nut.2015.11.015> PMID: 26944757
8. Torabynasab K, Shahinfar H, Payandeh N, Jazayeri S. Association between dietary caffeine, coffee, and tea consumption and depressive symptoms in adults: A systematic review and dose-response

- meta-analysis of observational studies. *Front Nutr*. 2023; 10:1051444. <https://doi.org/10.3389/fnut.2023.1051444> PMID: 36845051
9. Grosso G, Micek A, Castellano S, Pajak A, Galvano F. Coffee, tea, caffeine and risk of depression: A systematic review and dose-response meta-analysis of observational studies. *Mol Nutr Food Res*. 2016 Jan; 60(1):223–34. <https://doi.org/10.1002/mnfr.201500620> PMID: 26518745
  10. Wang C, Zhou C, Guo T, Jiaerken Y, Yang S, Xu X, et al. Current coffee consumption is associated with decreased striatal dopamine transporter availability in Parkinson's disease patients and healthy controls. *BMC Med*. 2023 Jul 25; 21(1):272. <https://doi.org/10.1186/s12916-023-02994-5> PMID: 37491235
  11. Qi H, Li S. Dose-response meta-analysis on coffee, tea and caffeine consumption with risk of Parkinson's disease. *Geriatr Gerontol Int*. 2014 Apr; 14(2):430–9. <https://doi.org/10.1111/ggi.12123> PMID: 23879665
  12. van Westing AC, Ochoa-Rosales C, van der Burgh AC, Chaker L, Geleijnse JM, Hoorn EJ, et al. Association of habitual coffee consumption and kidney function: A prospective analysis in the Rotterdam Study. *Clin Nutr*. 2023 Feb; 42(2):83–92. <https://doi.org/10.1016/j.clnu.2022.11.017> PMID: 36516702
  13. Pounis G, Tabolacci C, Costanzo S, Cordella M, Bonaccio M, Rago L, et al. Reduction by coffee consumption of prostate cancer risk: Evidence from the Moli-sani cohort and cellular models. *Int J Cancer*. 2017 Jul 1; 141(1):72–82. <https://doi.org/10.1002/ijc.30720> PMID: 28436066
  14. Crous-Bou M, Du M, Gunter MJ, Setiawan VW, Schouten LJ, Shu XO, et al. Coffee consumption and risk of endometrial cancer: a pooled analysis of individual participant data in the Epidemiology of Endometrial Cancer Consortium (E2C2). *Am J Clin Nutr*. 2022 Nov; 116(5):1219–28. <https://doi.org/10.1093/ajcn/nqac229> PMID: 36041172
  15. Yew YW, Lai YC, Schwartz RA. Coffee Consumption and Melanoma: A Systematic Review and Meta-Analysis of Observational Studies. *Am J Clin Dermatol*. 2016 Apr; 17(2):113–23. <https://doi.org/10.1007/s40257-015-0165-1> PMID: 26547919
  16. Caini S, Cattaruzza MS, Bendinelli B, Tosti G, Masala G, Gnagnarella P, et al. Coffee, tea and caffeine intake and the risk of non-melanoma skin cancer: a review of the literature and meta-analysis. *Eur J Nutr*. 2017 Feb; 56(1):1–12. <https://doi.org/10.1007/s00394-016-1253-6> PMID: 27388462
  17. Gökçen BB, Şanlıer N. Coffee consumption and disease correlations. *Crit Rev Food Sci Nutr*. 2019; 59(2):336–48. <https://doi.org/10.1080/10408398.2017.1369391> PMID: 28853910
  18. Ding M, Satija A, Bhupathiraju SN, Hu Y, Sun Q, Han J, et al. Association of Coffee Consumption With Total and Cause-Specific Mortality in 3 Large Prospective Cohorts. *Circulation*. 2015 Dec 15; 132(24):2305–15. <https://doi.org/10.1161/CIRCULATIONAHA.115.017341> PMID: 26572796
  19. Chen Y, Zhang Y, Zhang M, Yang H, Wang Y. Consumption of coffee and tea with all-cause and cause-specific mortality: a prospective cohort study. *BMC Med*. 2022 Nov 18; 20(1):449. <https://doi.org/10.1186/s12916-022-02636-2> PMID: 36397104
  20. Suares NC, Ford AC. Prevalence of, and Risk Factors for, Chronic Idiopathic Constipation in the Community: Systematic Review and Meta-analysis. *American Journal of Gastroenterology*. 2011 Sep; 106(9):1582–91. <https://doi.org/10.1038/ajg.2011.164> PMID: 21606976
  21. Ma C, Congly SE, Novak KL, Belletrutti PJ, Raman M, Woo M, et al. Epidemiologic Burden and Treatment of Chronic Symptomatic Functional Bowel Disorders in the United States: A Nationwide Analysis. *Gastroenterology*. 2021 Jan; 160(1):88–98.e4. <https://doi.org/10.1053/j.gastro.2020.09.041> PMID: 33010247
  22. Silveira EA, Santos AS e A de C, Ribeiro JN, Noll M, dos Santos Rodrigues AP, de Oliveira C. Prevalence of constipation in adults with obesity class II and III and associated factors. *BMC Gastroenterol*. 2021 May 12; 21:217. <https://doi.org/10.1186/s12876-021-01806-5> PMID: 33980157
  23. Markland AD, Palsson O, Goode PS, Burgio KL, Busby-Whitehead J, Whitehead WE. Association of low dietary intake of fiber and liquids with constipation: evidence from the National Health and Nutrition Examination Survey. *Am J Gastroenterol*. 2013 May; 108(5):796–803. <https://doi.org/10.1038/ajg.2013.73> PMID: 23567352
  24. Murakami K, Okubo H, Sasaki S. Dietary intake in relation to self-reported constipation among Japanese women aged 18–20 years. *Eur J Clin Nutr*. 2006 May; 60(5):650–7. <https://doi.org/10.1038/sj.ejcn.1602365> PMID: 16340942
  25. Dukas L, Willett WC, Giovannucci EL. Association between physical activity, fiber intake, and other lifestyle variables and constipation in a study of women. *The American Journal of Gastroenterology*. 2003 Aug 1; 98(8):1790–6. <https://doi.org/10.1111/j.1572-0241.2003.07591.x> PMID: 12907334
  26. Chang JY, Locke GR, Schleck CD, Zinsmeister AR, Talley NJ. Risk factors for chronic constipation and a possible role of analgesics. *Neurogastroenterology & Motility*. 2007; 19(11):905–11. <https://doi.org/10.1111/j.1365-2982.2007.00974.x> PMID: 17988275

27. Sommers T, Mitsuhashi S, Singh P, Hirsch W, Katon J, Ballou S, et al. Prevalence of Chronic Constipation and Chronic Diarrhea in Diabetic Individuals in the United States. *Am J Gastroenterol*. 2019 Jan; 114(1):135–42. <https://doi.org/10.1038/s41395-018-0418-8> PMID: 30410038
28. Wang J, Kong W, Liu M, Wang Y, Zheng Y, Zhou Y. Association between dietary carotenoids intake and chronic constipation in American men and women adults: a cross-sectional study. *BMC Public Health*. 2023 Aug 22; 23(1):1597. <https://doi.org/10.1186/s12889-023-16367-3> PMID: 37608273
29. Duan R, Zheng Y, Kong W, Wang Y, Zhou Y. Association of environmental tobacco smoke exposure with chronic constipation: a nationwide survey (NHANES 2005–2010). *Environ Sci Pollut Res*. 2023 Nov; 30(54):115776–87. <https://doi.org/10.1007/s11356-023-30542-4> PMID: 37889412
30. Yun Q, Wang S, Chen S, Luo H, Li B, Yip P, et al. Constipation preceding depression: a population-based cohort study. *eClinicalMedicine*. 2024 Jan 16; 67:102371. <https://doi.org/10.1016/j.eclinm.2023.102371> PMID: 38264501
31. Reedy J, Lerman JL, Krebs-Smith SM, Kirkpatrick SI, Pannucci TE, Wilson MM, et al. Evaluation of the Healthy Eating Index-2015. *J Acad Nutr Diet*. 2018 Sep; 118(9):1622–33. <https://doi.org/10.1016/j.jand.2018.05.019> PMID: 30146073
32. Sloots CEJ, Felt-Bersma RJF, West RL, Kuipers EJ. Stimulation of defecation: Effects of coffee use and nicotine on rectal tone and visceral sensitivity. *Scandinavian Journal of Gastroenterology*. 2005 Jan 1; 40(7):808–13. <https://doi.org/10.1080/00365520510015872> PMID: 16109656
33. Michels KB, Willett WC, Fuchs CS, Giovannucci E. Coffee, Tea, and Caffeine Consumption and Incidence of Colon and Rectal Cancer. *JNCI: Journal of the National Cancer Institute*. 2005 Feb 16; 97(4):282–92. <https://doi.org/10.1093/jnci/dji039> PMID: 15713963
34. Nehlig A. Effects of Coffee on the Gastro-Intestinal Tract: A Narrative Review and Literature Update. *Nutrients*. 2022 Jan 17; 14(2):399. <https://doi.org/10.3390/nu14020399> PMID: 35057580
35. Goldstein DS, Sullivan P, Corrales A, Isonaka R, Gelsomino J, Cherup J, et al. Multiple catechols in human plasma after drinking caffeinated or decaffeinated coffee. *Journal of Chromatography B*. 2021 Nov 15; 1185:122988. <https://doi.org/10.1016/j.jchromb.2021.122988> PMID: 34731744
36. Ferré S, O'Brien MC. Alcohol and Caffeine: The Perfect Storm. *J Caffeine Res*. 2011 Sep; 1(3):153–62. <https://doi.org/10.1089/jcr.2011.0017> PMID: 24761263
